# Supplementary material
Source: bioRxiv or medRxiv preprint supplement (https://www.biorxiv.org/highwire/filestream/92304/field_highwire_adjunct_files/0/300335-1.pdf)
Supplement: Supplementary file [file 300335-1.pdf]

1 Supplementary figures

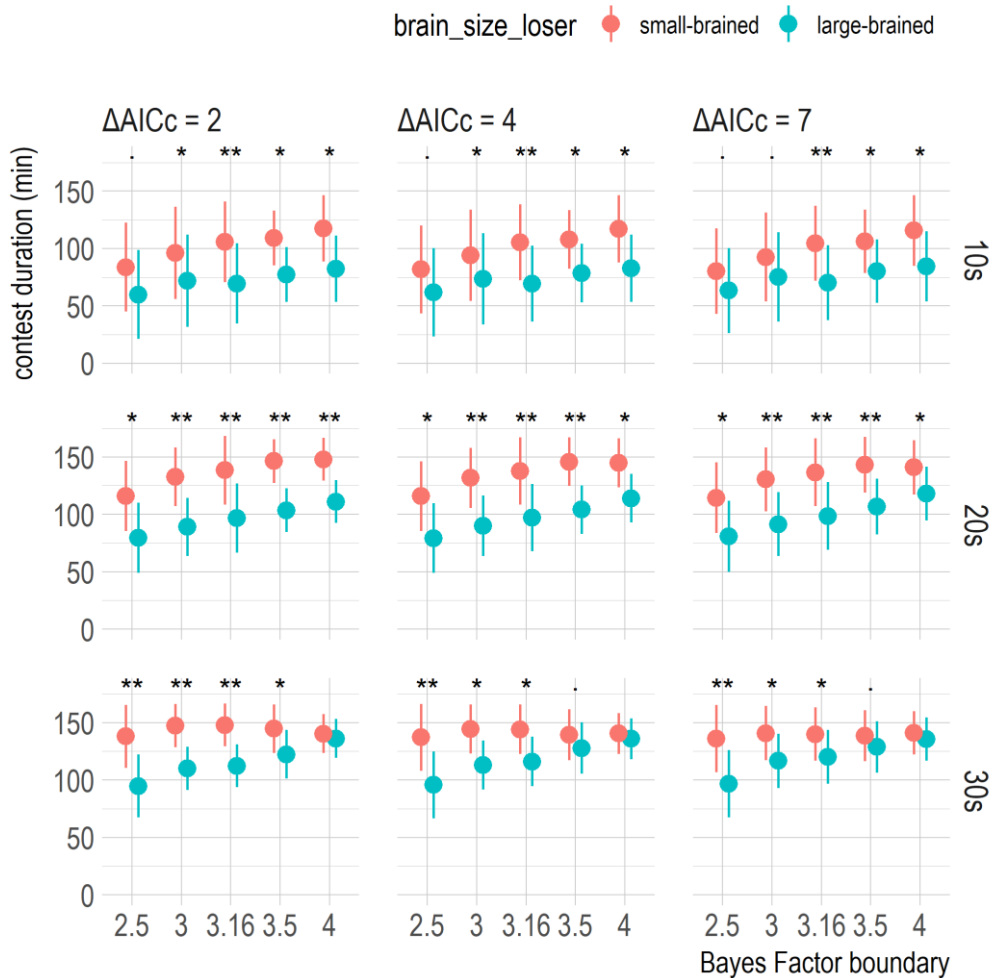

2

3 Figure S1: An exploration of the robustness of the effect of loser brain size in regards to differences in  
 4 analysis choices. Specifically, we re-ran the analysis reported in the main text, which uses a Bayes  
 5 Factor boundary of  $\sim 3.16$  ( $10^{1/2}$ ),  $\Delta AICc$  of 4 and a sampling interval of 10 seconds, and varied the  
 6 values for all three of these choices. Significance based on the average model is indicated with symbols,  
 7 where .  $p < 0.1$ , \*  $p < 0.05$ , \*\*  $p < 0.01$ . In 36 out of 45 scenarios the effect remained significant, in an  
 8 additional 6 cases the effect was a trend ( $p < 0.1$ ) in the same direction, and for no parameter  
 9 combination was the effect reversed.

## 10 Supplementary tables

| Coefficients   | df | AICc   | $\Delta$ AICc | weight |
|----------------|----|--------|---------------|--------|
| 2/4/5/8/11     | 9  | 777.6  | 0             | 0.09   |
| 2/4/5/8/11/18  | 10 | 777.94 | 0.34          | 0.07   |
| 2/4/8/11       | 8  | 778.68 | 1.08          | 0.05   |
| 2/4/5/8/11/14  | 10 | 779.06 | 1.46          | 0.04   |
| 4/5/8/11       | 8  | 779.32 | 1.72          | 0.04   |
| 2/4/5/8/11/16  | 10 | 779.56 | 1.96          | 0.03   |
| 2/4/5/8/9/11   | 10 | 779.67 | 2.07          | 0.03   |
| 2/4/5/8/10/11  | 10 | 779.73 | 2.13          | 0.03   |
| 2/4/8/11/18    | 9  | 779.83 | 2.24          | 0.03   |
| 2/4/5/8/11/15  | 10 | 780.07 | 2.47          | 0.02   |
| 2/3/4/5/8/11   | 10 | 780.11 | 2.51          | 0.02   |
| 1/2/4/5/8/11   | 10 | 780.17 | 2.57          | 0.02   |
| 2/4/5/8/11/17  | 10 | 780.25 | 2.65          | 0.02   |
| 2/4/5/8/11/12  | 10 | 780.27 | 2.67          | 0.02   |
| 2/4/5/8/11/13  | 10 | 780.27 | 2.67          | 0.02   |
| 2/4/5/8/12/13  | 10 | 780.27 | 2.67          | 0.02   |
| 4/5/8/11/18    | 9  | 780.32 | 2.72          | 0.02   |
| 2/4/5/6/7/11   | 10 | 780.33 | 2.73          | 0.02   |
| 2/4/5/6/8/11   | 10 | 780.33 | 2.73          | 0.02   |
| 2/4/5/7/8/11   | 10 | 780.33 | 2.73          | 0.02   |
| 2/3/4/8/11     | 9  | 780.65 | 3.06          | 0.02   |
| 2/4/8/11/14    | 9  | 780.67 | 3.08          | 0.02   |
| 2/4/8/11/16    | 9  | 780.7  | 3.11          | 0.02   |
| 3/4/5/8/11/18  | 10 | 780.83 | 3.23          | 0.02   |
| 3/4/5/8/11     | 9  | 780.84 | 3.24          | 0.02   |
| 2/4/8/11/15    | 9  | 780.88 | 3.29          | 0.02   |
| 2/4/8/9/11     | 9  | 780.94 | 3.34          | 0.02   |
| 4/5/8/11/14    | 9  | 780.99 | 3.39          | 0.02   |
| 2/4/8/10/11    | 9  | 781.05 | 3.45          | 0.02   |
| 2/3/4/8/11/18  | 10 | 781.08 | 3.48          | 0.02   |
| 4/8/11         | 7  | 781.15 | 3.56          | 0.01   |
| 4/5/8/9/11     | 9  | 781.2  | 3.61          | 0.01   |
| 2/4/6/7/11     | 9  | 781.26 | 3.66          | 0.01   |
| 2/4/6/8/11     | 9  | 781.26 | 3.66          | 0.01   |
| 2/4/7/8/11     | 9  | 781.26 | 3.66          | 0.01   |
| 1/2/4/8/11     | 9  | 781.26 | 3.66          | 0.01   |
| 2/4/8/11/12    | 9  | 781.3  | 3.71          | 0.01   |
| 2/4/8/11/13    | 9  | 781.3  | 3.71          | 0.01   |
| 2/4/8/12/13    | 9  | 781.3  | 3.71          | 0.01   |
| 2/4/8/11/17    | 9  | 781.32 | 3.72          | 0.01   |
| 1/4/5/8/11     | 9  | 781.4  | 3.8           | 0.01   |
| 4/5/8/11/14/18 | 10 | 781.53 | 3.94          | 0.01   |
| 2/4/8/11/14/18 | 10 | 781.54 | 3.95          | 0.01   |

11 Table S1: All models within 4  $\Delta$ AICc. Coefficient numbers refer to: 1 difference in black coloration, 2  
 12 black coloration of the loser, 3 black coloration of the winner, 4 brain size of the loser, 5 brain size of  
 13 the winner, 6 difference in condition, 7 condition of the loser, 8 condition of the winner, 9 standard  
 14 length of the loser, 10 standard length of the winner, 11 difference in bright coloration, 12 bright  
 15 coloration of the loser, 13 bright coloration of the winner, 14 difference in standard length, 15  
 16 difference in tail length, 16 tail size of the loser, 17 tail size of the winner, 18 total displacement. All  
 17 models include an intercept and random intercepts for the interaction between the brain size of the  
 18 winner and the brain size of the loser, nested within replicate (*lme4* syntax: (1 | replicate /  
 19 (brain\_size\_winner : brain\_size\_loser))).

20

|                                     | <b>Estimate</b> | <b>SE</b> | <b>Adjusted SE</b> | <b>z</b> | <b>p</b> |     |
|-------------------------------------|-----------------|-----------|--------------------|----------|----------|-----|
| <i>(Intercept)</i>                  | 114.461         | 14.799    | 15.030             | 7.62     | < 0.001  | *** |
| <i>loser brain size</i>             | -35.937         | 13.261    | 13.523             | 2.66     | 0.008    | **  |
| <i>winner brain size</i>            | -17.965         | 16.613    | 16.752             | 1.07     | 0.284    |     |
| <i>condition winner</i>             | -21.686         | 7.976     | 8.093              | 2.68     | 0.007    | **  |
| <i>difference bright coloration</i> | 25.221          | 8.458     | 8.572              | 2.94     | 0.003    | **  |
| <i>black coloration loser</i>       | -12.498         | 8.239     | 8.331              | 1.50     | 0.134    |     |
| <i>total displacement</i>           | 1.787           | 4.812     | 4.848              | 0.37     | 0.712    |     |
| <i>difference standard length</i>   | -0.689          | 2.949     | 2.979              | 0.23     | 0.817    |     |
| <i>tail size loser</i>              | -0.285          | 1.942     | 1.965              | 0.15     | 0.885    |     |
| <i>standard length loser</i>        | 0.315           | 2.055     | 2.082              | 0.15     | 0.880    |     |
| <i>standard length winner</i>       | -0.204          | 1.696     | 1.719              | 0.12     | 0.906    |     |
| <i>difference tail size</i>         | 0.164           | 1.611     | 1.636              | 0.10     | 0.920    |     |
| <i>black coloration winner</i>      | -0.668          | 3.154     | 3.185              | 0.21     | 0.834    |     |
| <i>difference black coloration</i>  | 0.153           | 1.683     | 1.711              | 0.09     | 0.929    |     |
| <i>tail size winner</i>             | -0.042          | 1.396     | 1.424              | 0.03     | 0.976    |     |
| <i>bright coloration loser</i>      | -0.764          | 4.332     | 4.353              | 0.18     | 0.861    |     |
| <i>bright coloration winner</i>     | 0.666           | 4.185     | 4.207              | 0.16     | 0.874    |     |
| <i>difference condition</i>         | -0.991          | 5.512     | 5.534              | 0.18     | 0.858    |     |
| <i>condition loser</i>              | -0.553          | 3.595     | 3.616              | 0.15     | 0.878    |     |

21 Table S2: Coefficients, standard errors and test statistics of all terms after full model averaging.

22
